Anesthesiology  
1996; 85:112-20  
© 1996 American Society of Anesthesiologists, Inc.  
Lippincott-Raven Publishers

## Influence of Volatile Anesthetics on Left Ventricular Afterload In Vivo

### Differences between Desflurane and Sevoflurane

Dermot Lowe, M.Sc., F.F.A.R.C.S.I.,\* Douglas A. Hettrick, Ph.D.,† Paul S. Pagel, M.D., Ph.D.,‡  
David C. Warltier, M.D., Ph.D.‡

**Background:** This investigation examined the effects of desflurane and sevoflurane on quantitative indices of left ventricular afterload derived from aortic input impedance ( $Z_{in}$ ) interpreted using a three-element Windkessel model.

**Methods:** After Animal Care Committee approval, dogs ( $n = 8$ ) were chronically instrumented for measurement of systemic hemodynamics including aortic blood pressure and flow. On separate days, aortic pressure and flow waveforms were recorded under steady-state conditions in the conscious state and after equilibration for 30 min at 1.1, 1.3, 1.5, and 1.7 minimum alveolar concentration of desflurane or sevoflurane. Aortic input impedance spectra were obtained *via* power spectral analysis of aortic pressure and flow waveforms. Characteristic aortic impedance ( $Z_c$ ) and total arterial resistance were calculated as the mean of the magnitude of  $Z_{in}$  between 2 and 15 Hz and the difference between  $Z_{in}$  at zero frequency and  $Z_c$ , respectively. Total arterial compliance ( $C$ ) was calculated from aortic pressure and flow waveforms using the Windkessel model.

**Results:** Desflurane and sevoflurane increased heart rate and decreased systolic, diastolic, and mean arterial pressure, left ventricular systolic pressure, left ventricular peak positive rate of increase in left ventricular pressure, percent segment shortening, and stroke volume. Sevoflurane, but not desflurane, decreased cardiac output. Desflurane, but not sevoflurane, decreased systemic vascular resistance. Desflurane

decreased  $R$  ( $3,170 \pm 188$  during control to  $2,441 \pm 220$  dynes · second · centimeter<sup>-5</sup> at 1.7 minimum alveolar concentration) and did not alter  $C$  and  $Z_c$ . In contrast, sevoflurane increased  $C$  ( $0.57 \pm 0.05$  during control to  $0.79 \pm 0.05$  ml/mmHg at 1.7 minimum alveolar concentration) and  $Z_c$  ( $139 \pm 10$  during control to  $194 \pm 14$  dynes · second · centimeter<sup>-5</sup> at 1.7 minimum alveolar concentration) but did not change  $R$ .

**Conclusions:** The results indicate that desflurane and sevoflurane produce substantially different effects on left ventricular afterload in chronically instrumented dogs. Desflurane-induced decreases in systemic vascular resistance occur primarily because of effects on arteriolar resistance vessels. In contrast, sevoflurane increased  $C$  and  $Z_c$  concomitant with pressure-dependent reductions in aortic diameter, suggesting that this anesthetic may alter left ventricular afterload by affecting the mechanical properties of the aorta. (Key words: Anesthetics, volatile; desflurane; sevoflurane. Heart: left ventricular afterload. Hemodynamics: aortic blood flow; aortic pressure. Signal processing: coherence function; power spectrum analysis.)

THE two new volatile anesthetics, desflurane and sevoflurane, have been shown to produce cardiovascular effects that share many similarities with older inhalational agents.<sup>1</sup> Like other volatile anesthetics, desflurane and sevoflurane cause dose-related reductions in arterial blood pressure in humans.<sup>2-7</sup> These hypotensive effects have been attributed to depression of myocardial contractility<sup>4,5,8-11</sup> and alterations in ventricular loading conditions.<sup>2-7,9-11</sup> While the vast majority of experimental and clinical evidence suggests that desflurane causes dose-related declines in systemic vascular resistance and end-systolic wall stress similar to isoflurane *in vivo*,<sup>2-5,11</sup> the effects of sevoflurane on these measures of LV afterload are somewhat more controversial.<sup>6,9,10,12,13</sup> Previous investigations from this<sup>9</sup> and other laboratories<sup>12,14-16</sup> have shown that sevoflurane does not alter calculated systemic vascular resistance in experimental animals. In contrast, other studies have implied that sevoflurane reduces systemic vascular resistance concomitant with declines in arterial blood

\* Visiting Assistant Professor in Anesthesiology.

† Assistant Professor of Anesthesiology.

‡ Professor of Anesthesiology, Pharmacology, and Medicine (Division of Cardiology); Vice Chairman for Research, Department of Anesthesiology.

Received from the Departments of Anesthesiology, Pharmacology, and Medicine, Medical College of Wisconsin, Milwaukee, Wisconsin, and the Zablocki Department of Veterans Affairs Medical Center, Milwaukee, Wisconsin. Submitted for publication October 16, 1995. Accepted for publication February 23, 1996. Supported by United States Public Health Services grant HL 54280 and Anesthesiology Research Training grant GM 08377.

Address reprint requests to Dr. Warltier: Department of Anesthesiology, MEB, Room 462C, Medical College of Wisconsin, 8701 Watertown Plank Road, Milwaukee, Wisconsin 53226.

pressure.<sup>6,10,13</sup> The disparity may be partially explained resistance is an inadequate fails to account for the phase pressure and flow. Aortic in experimental description of porates the frequency-depe istics of the arterial system. that halothane, isoflurane, ferential actions on LV after The current investigation desflurane and sevoflurane on indexes of LV afterload using the three-element W terial circulation in chroni

### Materials and Methods

All experimental proce this investigation were rev Animal Care Committee of consin. All procedures o Principles in the Care of American Physiological So accordance with the Gu Laboratory Animals. §

### General Preparation

Surgical implantation e scribed previously in de anesthesia and aseptic su 8) underwent a left thor micromanometer was in for measurement of con maximum rate of increa Heparin-filled catheters descending thoracic aor left atrium for measure administration, and calib eter, respectively. An ult was positioned around th measurement of continu of miniature ultrasonic were implanted in the surement of changes in

§ Guide for the Care and U of Health and Human Services DC, Department of Health, Ed

## DESFLURANE, SEVOFLURANE, AND LV AFTERLOAD

pressure.<sup>6,10,13</sup> The disparity between these findings may be partially explained because systemic vascular resistance is an inadequate measure of LV afterload that fails to account for the phasic nature of arterial blood pressure and flow. Aortic input impedance ( $Z_{in}$ ) is an experimental description of LV afterload that incorporates the frequency-dependent, pulsatile characteristics of the arterial system.<sup>17</sup> We demonstrated recently that halothane, isoflurane, and propofol produce differential actions on LV afterload evaluated with  $Z_{in}$ .<sup>18,19</sup> The current investigation tested the hypothesis that desflurane and sevoflurane produce differential actions on indexes of LV afterload derived from  $Z_{in}$  quantified using the three-element Windkessel model of the arterial circulation in chronically instrumented dogs.

### Materials and Methods

All experimental procedures and protocols used in this investigation were reviewed and approved by the Animal Care Committee of the Medical College of Wisconsin. All procedures conformed to the *Guiding Principles in the Care and Use of Animals* of the American Physiological Society and were performed in accordance with the *Guide for the Care and Use of Laboratory Animals*.<sup>§</sup>

#### General Preparation

Surgical implantation of instruments has been described previously in detail.<sup>18</sup> Briefly, under general anesthesia and aseptic surgical conditions, dogs ( $n = 8$ ) underwent a left thoracotomy, and a high-fidelity micromanometer was inserted into the left ventricle for measurement of continuous LV pressure and the maximum rate of increase in LV pressure ( $dP/dt_{max}$ ). Heparin-filled catheters were placed in the proximal descending thoracic aorta, the right atrium, and the left atrium for measurement of aortic pressure, fluid administration, and calibration of the LV micromanometer, respectively. An ultrasonic transit-time flow probe was positioned around the ascending thoracic aorta for measurement of continuous aortic blood flow. A pair of miniature ultrasonic segment length transducers were implanted in the LV subendocardium for measurement of changes in regional contractile function.

§ Guide for the Care and Use of Laboratory Animals, Department of Health and Human Services publication NIH 85-23. Washington, DC, Department of Health, Education, and Welfare, 1985.

All instrumentation was secured, tunneled between the scapulae, and exteriorized *via* several small incisions. The pericardium was left wide open, the chest wall closed in layers, and the pneumothorax evacuated by a chest tube.

All dogs received systemic analgesics (fentanyl) as needed after surgery. Dogs were allowed to recover a minimum of 7 days before experimentation during which time all were treated with intramuscular antibiotics (40 mg/kg cephalothin and 4.5 mg/kg gentamicin) and were trained to stand quietly in an animal sling during recording of hemodynamics. An ultrasonic amplifier was used to monitor segment length signals. End-systolic and end-diastolic segment lengths were measured at 30 ms before maximum negative LV  $dP/dt$  and just prior to the onset of LV isovolumic contraction, respectively. Percent segment shortening was calculated using the equation: percent segment shortening = (end-diastolic segment length - end-systolic segment length)  $\cdot 100 \cdot$  end-diastolic segment length<sup>-1</sup>. Hemodynamic data were continuously recorded on a polygraph and digitized by a computer interfaced with an analog to digital converter.<sup>18</sup>

#### Calculation of Aortic Input Impedance $Z_{in}(\omega)$ Spectra

Aortic input impedance spectra were obtained from digitized, steady-state aortic blood pressure and aortic blood flow waveforms.<sup>20,21</sup> Briefly, data files consisting of 4,096 points were sampled at 100 Hz and divided into five 2,048-point bins with 1,536 point overlap.<sup>18</sup> A Hamming window was applied to each bin to reduce side lobe leakage. The autopower spectrum of the aortic blood pressure [ $P_{pp}(\omega)$ ], aortic blood flow [ $P_{ff}(\omega)$ ] and cross power spectrum between aortic pressure and blood flow wave forms [ $P_{pf}(\omega)$ ] were determined using a Welch periodogram technique.<sup>22,23</sup> Each  $Z_{in}(\omega)$  spectrum was calculated as a function of frequency ( $\omega$ ) using the formula:  $Z_{in}(\omega) = P_{pp}(\omega) \cdot [P_{pf}(\omega)]^{-1}$  and corrected for the phase response and position of the aortic flow probe and aortic pressure transducer as described previously.<sup>18</sup> Typical  $Z_{in}(\omega)$  magnitude and phase spectra in the conscious state and during desflurane and sevoflurane anesthesia are depicted in figures 1 and 2, respectively. Correlation of aortic pressure and flow waveforms at each frequency of  $Z_{in}(\omega)$  was determined using the magnitude squared coherence (MSC), where magnitude squared coherence ( $\omega$ ) =  $|P_{pf}(\omega)|^2 \cdot [P_{pp}(\omega) \cdot P_{ff}(\omega)]^{-1}$ . All  $Z_{in}(\omega)$  data with magnitude squared coherence values  $< 0.8$  were discarded.

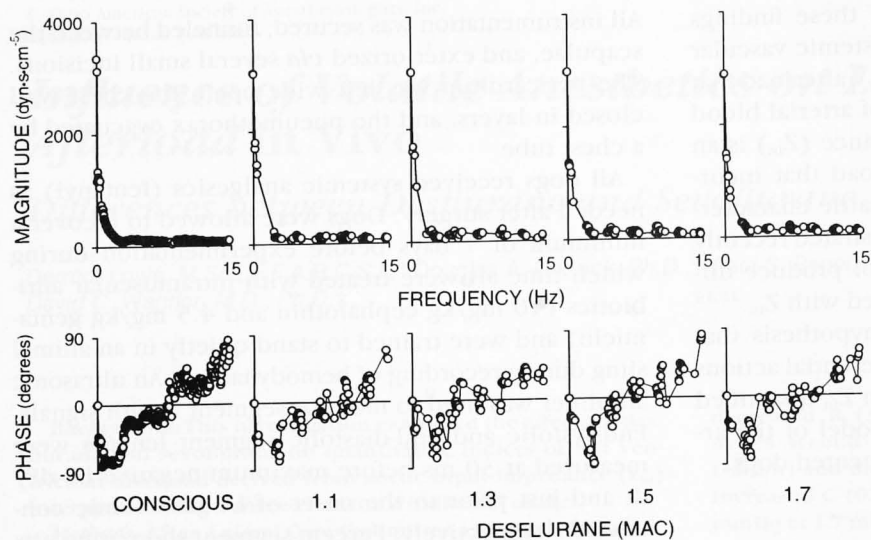

Fig. 1. Aortic input impedance spectrum consisting of magnitude (top) and phase components (bottom) obtained in the conscious state and during desflurane anesthesia at 1.1, 1.3, 1.5, and 1.7 minimum alveolar concentration in a typical experiment.

Windkessel model parameters were derived from the calculated  $Z_{in}(\omega)$  spectra.<sup>18</sup> Characteristic aortic impedance ( $Z_c$ ) was determined as the mean of the magnitude of  $Z_{in}(\omega)$  ( $|Z_{in}(\omega)|$ ) between 2 and 15 Hz.<sup>21,24,25</sup> Total arterial resistance (R) was calculated as the difference between the value of  $|Z_{in}(\omega)|$  at zero frequency and  $Z_c$ .

The magnitude of  $Z_{in}(\omega)$  at zero frequency was equal to systemic vascular resistance determined as the ratio of mean arterial pressure and mean aortic blood flow.<sup>17</sup> Total arterial compliance (C) was calculated using the formula:  $C = (A_d \cdot MAQ) \cdot [MAP \cdot (P_{es} - P_{ed})]^{-1}$ , where  $A_d$  = the area under the diastolic portion of the arterial

pressure curve, MAQ = mean aortic blood flow, MAP = mean arterial pressure, and  $P_{es}$  and  $P_{ed}$  = end-systolic and end-diastolic aortic pressure, respectively.<sup>26</sup> The diastolic period used for the calculation of C was defined as the time between the dichrotic notch and minimal aortic pressure. The value of C was determined from the average of five consecutive beats for each intervention.

Experimental Protocol

Dogs were assigned to receive desflurane or sevoflurane in a random manner on separate experimental days. Fluid deficits were replaced with 0.9% saline (500

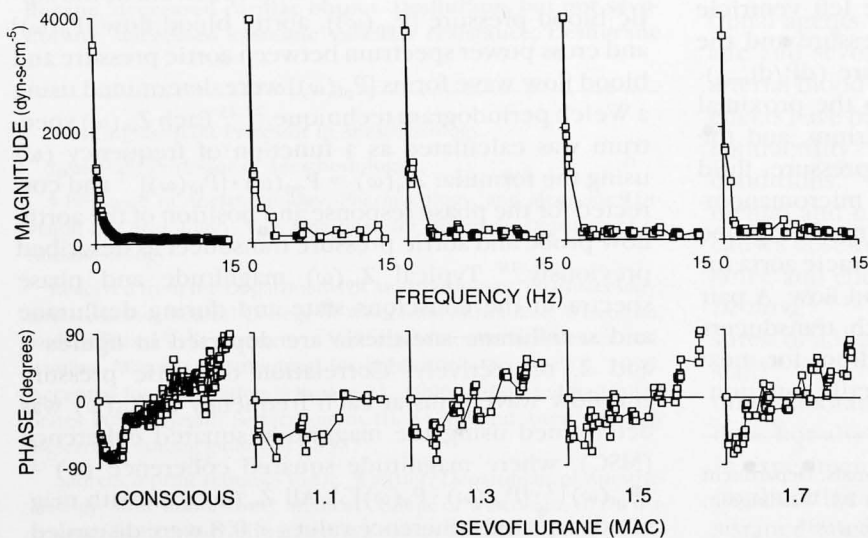

Fig. 2. Aortic input impedance spectrum consisting of magnitude (top) and phase components (bottom) obtained in the conscious state and during sevoflurane anesthesia at 1.1, 1.3, 1.5, and 1.7 minimum alveolar concentration in a typical experiment.

Table 1. Systemic Hemodynamic

| Parameter                                    | Conscious | 1.1 MAC | 1.3 MAC | 1.5 MAC | 1.7 MAC |
|----------------------------------------------|-----------|---------|---------|---------|---------|
| HR (beats/min)                               | 86        | 125     | 90      | 125     | 90      |
| SBP (mmHg)                                   | 125       | 100     | 125     | 100     | 125     |
| DBP (mmHg)                                   | 90        | 70      | 90      | 70      | 90      |
| MBP (mmHg)                                   | 100       | 75      | 100     | 75      | 100     |
| LVSP (mmHg)                                  | 125       | 100     | 125     | 100     | 125     |
| LVEDP (mmHg)                                 | 12        | 12      | 12      | 12      | 12      |
| dP/dt <sub>max</sub> (mmHg·s <sup>-1</sup> ) | 2,450     | 2,450   | 2,450   | 2,450   | 2,450   |
| CO (L·min <sup>-1</sup> )                    | 2.1       | 2.1     | 2.1     | 2.1     | 2.1     |
| SVR (dyne·s·cm <sup>-5</sup> )               | 3,420     | 3,420   | 3,420   | 3,420   | 3,420   |
| SV (ml)                                      | 20        | 20      | 20      | 20      | 20      |
| SS (%)                                       | 2         | 2       | 2       | 2       | 2       |

Data are mean ± SEM; n = 8.  
 HR = heart rate; SBP = systolic blood pressure; DBP = diastolic blood pressure; MBP = mean blood pressure; LVSP = left ventricular end-systolic pressure; LVEDP = left ventricular end-diastolic pressure; SV = stroke volume; SS = segment shortening.  
 \* Significantly (P < 0.05) different from conscious.  
 † Significantly (P < 0.05) different from 1.1 MAC.  
 ‡ Significantly (P < 0.05) different from 1.3 MAC.

ml), and maintenance fluid was continued (3 ml·kg<sup>-1</sup>·h<sup>-1</sup>) for the experiment. After instrumentation, systemic hemodynamics were recorded in the conscious state conditions in the conscious state aortic blood pressure and aortic flow were recorded for 10 min.  $Z_{in}(\omega)$ . After inhalation of desflurane, anesthesia was maintained at 1.1 MAC. Sevoflurane in an air and oxygen mixture in order of MAC was assigned. Values for desflurane and sevoflurane investigation were 7.40 and 2.00 tidal concentrations of desflurane measured at the tip of the end-tidal gas analyzer (Datex-Ohmeda) that was calibrated with known pressures and blood flow was maintained for 30 min of equilibration after anesthesia. Arterial blood gas tensions were maintained at conscious levels by adjusting oxygen concentrations and respiratory rate. Emergence was allowed after completion of each experiment. The dogs were covered at least 2 days

## DESFLURANE, SEVOFLURANE, AND LV AFTERLOAD

Table 1. Systemic Hemodynamic Effects of Desflurane

|                                                | Control     | Desflurane (MAC) |                |               |                  |
|------------------------------------------------|-------------|------------------|----------------|---------------|------------------|
|                                                |             | 1.1              | 1.3            | 1.5           | 1.7              |
| HR (beats/min)                                 | 86 ± 2      | 142 ± 6*         | 140 ± 6*       | 140 ± 6*      | 143 ± 6*         |
| SBP (mmHg)                                     | 125 ± 6     | 102 ± 3*         | 91 ± 3*        | 89 ± 3*,†     | 84 ± 5*,†        |
| DBP (mmHg)                                     | 90 ± 5      | 85 ± 3           | 76 ± 4*        | 72 ± 4*       | 62 ± 5*,†        |
| MBP (mmHg)                                     | 100 ± 4     | 90 ± 3*          | 83 ± 4*        | 77 ± 3*,†     | 68 ± 5*,†        |
| LVSP (mmHg)                                    | 126 ± 7     | 104 ± 4*         | 95 ± 5*        | 90 ± 5*,†     | 84 ± 3*,†        |
| LVEDP (mmHg)                                   | 9 ± 1       | 6 ± 1            | 6 ± 1          | 8 ± 1         | 8 ± 1            |
| dP/dt <sub>max</sub> (mmHg · s <sup>-1</sup> ) | 2,457 ± 124 | 1,880 ± 105*     | 1,601 ± 108*,† | 1,427 ± 94*,† | 1,297 ± 102*,†,‡ |
| CO (L · min <sup>-1</sup> )                    | 2.4 ± 0.2   | 2.3 ± 0.2        | 2.3 ± 0.1      | 2.1 ± 0.1     | 2.1 ± 0.2*       |
| SVR (dyne · s · cm <sup>-5</sup> )             | 3,424 ± 234 | 3,152 ± 202      | 2,884 ± 162    | 2,995 ± 226   | 2,763 ± 281*     |
| SV (ml)                                        | 28 ± 2      | 17 ± 1*          | 17 ± 1*        | 15 ± 1*       | 15 ± 2*          |
| SS (%)                                         | 22 ± 2      | 17 ± 2*          | 16 ± 2*        | 12 ± 2*,†     | 12 ± 2*,†        |

Data are mean ± SEM; n = 8.

HR = heart rate; SBP = systolic blood pressure; DBP = diastolic blood pressure; MBP = mean blood pressure; LVSP = left ventricular systolic pressure; LVEDP = left ventricular end-diastolic pressure; dP/dt<sub>max</sub> = maximum rate of change of left ventricular pressure; CO = cardiac output; SVR = systemic vascular resistance; SV = stroke volume; SS = segment shortening.

\* Significantly ( $P < 0.05$ ) different from control.

† Significantly ( $P < 0.05$ ) different from 1.1 MAC desflurane.

‡ Significantly ( $P < 0.05$ ) difference from 1.3 MAC desflurane.

ml), and maintenance fluids (0.9% saline) were continued ( $3 \text{ ml} \cdot \text{kg}^{-1} \cdot \text{h}^{-1}$ ) for the duration of each experiment. After instruments were calibrated, baseline systemic hemodynamics were recorded under steady-state conditions in the conscious state. Continuous aortic blood pressure and aortic blood flow waveforms were recorded for later generation and analysis of  $Z_{in}(\omega)$ . After inhalational induction and tracheal intubation, anesthesia was maintained during positive pressure ventilation at 1.1, 1.3, 1.5, or 1.7 minimum alveolar concentration (MAC; end-tidal) desflurane or sevoflurane in an air and oxygen (25%) mixture. The order of MAC was assigned randomly. The canine MAC values for desflurane and sevoflurane used in this investigation were 7.20 and 2.36%, respectively. End-tidal concentrations of desflurane and sevoflurane were measured at the tip of the endotracheal tube by an infrared gas analyzer (Datex Capnomac, Helsinki, Finland) that was calibrated with known standards before and during experimentation. Hemodynamics and aortic pressure and blood flow waveforms were recorded after 30 min of equilibration at each anesthetic concentration. Arterial blood gas tensions were maintained at conscious levels by adjustment of air and oxygen concentrations and respiratory rate throughout the experiment. Emergence was allowed to occur at the completion of each experiment. Dogs were allowed to recover at least 2 days before subsequent experi-

mentation. Thus, a total of 16 experiments were performed in 2 groups (desflurane and sevoflurane) using the same 8 dogs.

#### Statistical Analysis

Statistical analysis of data within and between groups in the conscious state and during anesthetic interventions were performed by multiple analysis of variance with repeated measures followed by application of Student's *t* test with Duncan's correction for multiplicity. The slope of the total arterial compliance-MAP relationship was determined by linear regression for each anesthetic. Parallelism of the linear slopes of the compliance-pressure data also was determined using the method of Tallarida and Murray.<sup>27</sup> Changes within and between groups were considered significant when  $P < 0.05$ . The data were expressed as mean ± SEM.

#### Results

Desflurane caused a significant ( $P < 0.05$ ) increase in heart rate ( $86 \pm 2$  during control to  $143 \pm 6$  beats/min at 1.7 MAC) and dose-related decreases in systolic, diastolic, and MAP ( $100 \pm 4$  during control to  $68 \pm 5$  mmHg at 1.7 MAC), LV systolic pressure, and stroke volume (table 1). No change in LV end-diastolic pressure was observed. Dose-related decreases in dP/dt<sub>max</sub>

( $2457 \pm 124$  during control to  $1297 \pm 102$  mmHg/s at 1.7 MAC) and percent segment shortening were observed in desflurane-anesthetized dogs, consistent with a negative inotropic effect. Desflurane also caused significant reductions in cardiac output and systemic vascular resistance at 1.7 MAC. A dose-related decrease in R ( $3,170 \pm 188$  during control to  $2441 \pm 220$  dynes  $\cdot$  second  $\cdot$  centimeter $^{-5}$  at 1.7 MAC; fig. 3) occurred. However, no changes in total arterial compliance (C) and characteristic aortic impedance ( $Z_c$ ) were observed during anesthesia with desflurane (fig. 3).

Sevoflurane produced hemodynamic actions that were somewhat different than those produced by desflurane (table 2). Sevoflurane also caused an increase in heart rate ( $88 \pm 4$  during control to  $129 \pm 4$  beats/min at 1.7 MAC). Dose-related decreases in systolic, diastolic, and MAP ( $99 \pm 5$  during control to  $61 \pm 4$  mmHg at 1.7 MAC), LV systolic pressure, and stroke volume were observed in dogs anesthetized with sevoflurane. These sevoflurane-induced decreases in systolic, diastolic, and MAPs and LV systolic pressure were greater than those produced by desflurane. No changes in LV end-diastolic pressure occurred. Sevoflurane decreased myocardial contractility as indicated by dose-related declines in  $dP/dt_{max}$  ( $2,343 \pm 161$  during control to  $1,051 \pm 80$  mmHg/s at 1.7 MAC) and percent segment shortening. These sevoflurane-induced negative inotropic effects were similar to those observed with desflurane. In contrast to the findings with desflurane, sevoflurane produced dose-related decreases in cardiac output ( $2.4 \pm 0.2$  during control to  $1.5 \pm 0.2$  l/min at 1.7 MAC). Systemic vascular resistance and R were also unchanged in sevoflurane-anesthetized dogs. Sevoflurane caused dose-related increases in  $Z_c$  ( $139 \pm 10$  during control to  $194 \pm 14$  dynes  $\cdot$  second  $\cdot$  centimeter $^{-5}$  at 1.7 MAC) and C ( $0.57 \pm 0.05$  during control to  $0.79 \pm 0.05$  ml/mmHg at 1.7 MAC; fig. 3), suggesting that alterations in the mechanical properties of the aorta were primarily responsible for changes in LV afterload during administration of this volatile anesthetic. No difference in the slope of the compliance-pressure relationship was observed between sevoflurane ( $-1.87 \cdot 10^{-3}$  ml  $\cdot$  mmHg $^{-2}$ ) and desflurane ( $-1.67 \cdot 10^{-3}$  ml  $\cdot$  mmHg $^{-2}$ ,  $t = -0.18$ ,  $P > 0.05$ ) groups.

## Discussion

Calculated systemic vascular resistance (the ratio of MAP to mean arterial blood flow) is used commonly to

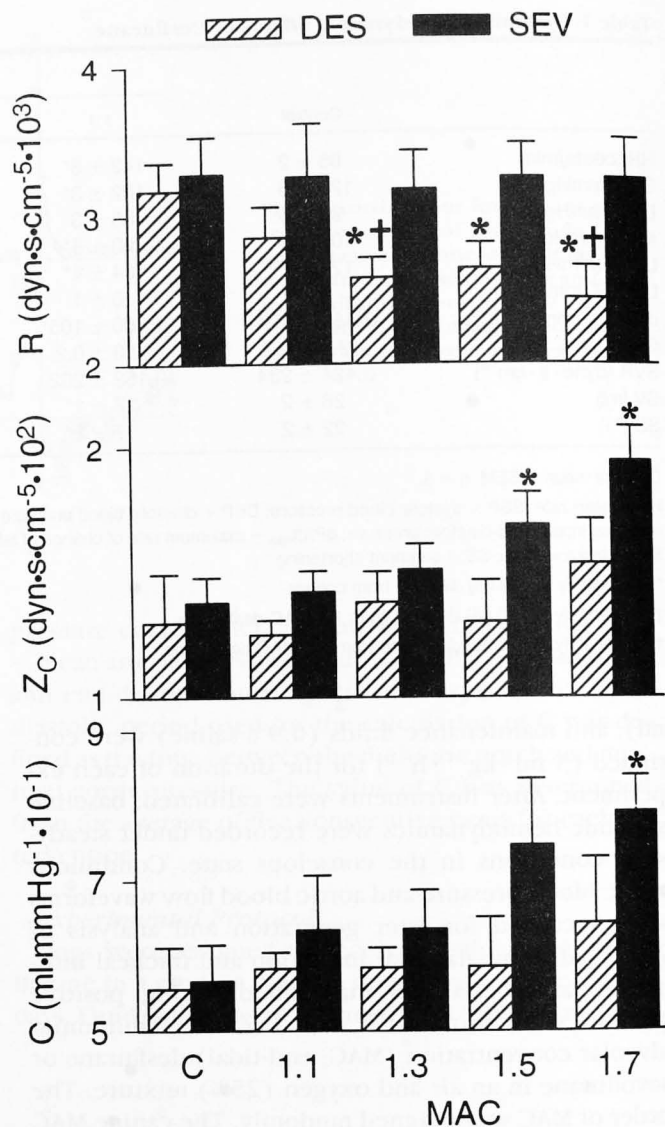

Fig. 3. Histograms depicting the effects of volatile anesthetics on total arterial resistance (R; top), characteristic aortic impedance ( $Z_c$ ; middle) and total arterial compliance (C; bottom) in the conscious (C) state and at 1.1, 1.3, 1.5, and 1.7 minimum alveolar concentration desflurane (DES) and sevoflurane (SEV). \*Significantly ( $P < 0.05$ ) different from conscious; †Significantly ( $P < 0.05$ ) different from sevoflurane.

estimate LV afterload *in vivo*. Although this index provides a qualitative description of arterial resistance to LV ejection, systemic vascular resistance cannot be used to strictly quantify alterations in afterload because this index ignores the mechanical properties of the arterial wall, fails to account for the potential effects of arterial wave reflection, and does not consider the dynamic, pulsatile nature of arterial blood pressure and blood

Table 2. Systemic Hemodynamic

| Parameter                                | Control | Sevoflurane |
|------------------------------------------|---------|-------------|
| HR (beats/min)                           | 88      | 129         |
| SBP (mmHg)                               | 86      | 61          |
| DBP (mmHg)                               | 99      | 61          |
| MBP (mmHg)                               | 123     | 61          |
| LVSP (mmHg)                              | 99      | 61          |
| LVEDP (mmHg)                             | 2,343   | 1,051       |
| $dP/dt_{max}$ (mmHg $\cdot$ s $^{-1}$ )  | 2,343   | 1,051       |
| CO (L $\cdot$ min $^{-1}$ )              | 3.34    | 1.5         |
| SVR (dyne $\cdot$ s $\cdot$ cm $^{-5}$ ) | 2,457   | 1,297       |
| SV (ml)                                  | 2.4     | 1.5         |
| SS (%)                                   | 2.4     | 1.5         |

Data are mean  $\pm$  SEM; n = 8.  
 HR = heart rate; SBP = systolic blood pressure; DBP = diastolic blood pressure; MBP = mean blood pressure; LVSP = left ventricular systolic pressure; LVEDP = left ventricular end-diastolic pressure; SV = stroke volume; SS = segment shortening.  
 \* Significantly ( $P < 0.05$ ) different from control.  
 † Significantly ( $P < 0.05$ ) different from sevoflurane.  
 ‡ Significantly ( $P < 0.05$ ) different from control.  
 § Significantly ( $P < 0.05$ ) different from sevoflurane.

flow.<sup>28</sup> In contrast,  $Z_c(\omega)$  is a quantitative measure of LV afterload that takes into account arterial viscoelasticity, wave reflection,<sup>17</sup> vasoactive drug effects,<sup>18,19</sup> and intravenous anesthetics,<sup>20</sup> and is determined by the mechanical properties of the arterial tree.<sup>18,19</sup>  $Z_c(\omega)$  produced by pharmacologic agents can be used to estimate  $Z_{in}(\omega)$  in a physiological state. The analysis of  $Z_{in}(\omega)$  is conducted in the frequency domain. As a result,  $Z_{in}(\omega)$  can be represented by a simplified electrical model as the three-element Windkessel model. The Windkessel model displays most of the features of  $Z_{in}(\omega)$ .<sup>30</sup> Windkessel models have been used to estimate  $Z_{in}(\omega)$  in a physiological state.<sup>18,19</sup>  $Z_{in}(\omega) = Z_c + R \cdot (1 + j \cdot \omega \cdot C)$ , where  $Z_c$  is characteristic aortic impedance, R is systemic vascular resistance, and C = total arterial compliance.  $Z_{in}(\omega)$  is determined by the Poiseuille resistances and the compliance of the arterial tree. Impedance is represented by the sum of Poiseuille resistances in series with frequency.<sup>29</sup> The sum of R and  $Z_c$  is equivalent to systemic vascular resistance.

## DESFLURANE, SEVOFLURANE, AND LV AFTERLOAD

Table 2. Systemic Hemodynamic Effects of Sevoflurane

|                                                | Control     | Sevoflurane (MAC) |              |                |                 |
|------------------------------------------------|-------------|-------------------|--------------|----------------|-----------------|
|                                                |             | 1.1               | 1.3          | 1.5            | 1.7             |
| HR (beats/min)                                 | 88 ± 4      | 131 ± 6*          | 132 ± 6*     | 128 ± 5*       | 129 ± 4*        |
| SBP (mmHg)                                     | 120 ± 5     | 92 ± 3*,§         | 86 ± 3*      | 81 ± 3*,†      | 69 ± 2*,†,‡,§   |
| DBP (mmHg)                                     | 86 ± 5      | 74 ± 3*,§         | 69 ± 2*      | 63 ± 3*,†      | 52 ± 5*,†,‡     |
| MBP (mmHg)                                     | 99 ± 5      | 80 ± 3*,§         | 75 ± 2*      | 67 ± 3*,†,§    | 61 ± 4*,†,‡     |
| LVSP (mmHg)                                    | 123 ± 7     | 93 ± 3*,§         | 87 ± 3*      | 82 ± 3*,†      | 70 ± 4*,†,‡,§   |
| LVEDP (mmHg)                                   | 9 ± 1       | 6 ± 1             | 6 ± 1        | 8 ± 1          | 8 ± 1           |
| dP/dt <sub>max</sub> (mmHg · s <sup>-1</sup> ) | 2,343 ± 161 | 1,496 ± 52*,§     | 1,320 ± 78*  | 1,116 ± 53*,†  | 1,051 ± 80*,†,‡ |
| CO (L · min <sup>-1</sup> )                    | 2.4 ± 0.2   | 2.0 ± 0.2*        | 1.9 ± 0.2*,§ | 1.6 ± 0.1*,†,§ | 1.5 ± 0.2*,†,‡  |
| SVR (dyne · s · cm <sup>-5</sup> )             | 3,344 ± 224 | 3,438 ± 377       | 3,315 ± 218  | 3,417 ± 214    | 3,466 ± 266     |
| SV (ml)                                        | 28 ± 2      | 16 ± 2*           | 14 ± 1*      | 13 ± 1*        | 12 ± 1*         |
| SS (%)                                         | 23 ± 2      | 16 ± 2*           | 15 ± 1*      | 11 ± 1*,†,‡    | 11 ± 2*,†,‡     |

Data are mean ± SEM; n = 8.

HR = heart rate; SBP = systolic blood pressure; DBP = diastolic blood pressure; MBP = mean blood pressure; LVSP = left ventricular systolic pressure; LVEDP = left ventricular end-diastolic pressure; dP/dt<sub>max</sub> = maximum rate of change of left ventricular pressure; CO = cardiac output; SVR = systemic vascular resistance; SV = stroke volume; SS = segment shortening.

\* Significantly ( $P < 0.05$ ) different from control.

† Significantly ( $P < 0.05$ ) different from 1.1 MAC sevoflurane.

‡ Significantly ( $P < 0.05$ ) different from 1.3 MAC sevoflurane.

§ Significantly ( $P < 0.05$ ) different from same MAC desflurane (table 1).

flow.<sup>28</sup> In contrast,  $Z_{in}(\omega)$  has been shown to be a quantitative measure of LV afterload that incorporates arterial viscoelasticity, frequency-dependence, and wave reflection.<sup>17</sup> Vasoactive drugs, including volatile and intravenous anesthetics, have been shown to alter  $Z_{in}(\omega)$  by affecting the mechanical properties of the arterial vascular tree.<sup>18,19,24,29</sup> However, changes in  $Z_{in}(\omega)$  produced by pharmacologic agents are difficult to quantify in a physiologically relevant way because analysis of  $Z_{in}(\omega)$  is conducted in the frequency domain. As a result,  $Z_{in}(\omega)$  often is interpreted using a simplified electrical model of the arterial system known as the three-element Windkessel.<sup>21</sup> The Windkessel model displays most of the frequency-dependent features of  $Z_{in}(\omega)$ .<sup>30</sup> Windkessel-derived variables can be used to estimate  $Z_{in}(\omega)$  as a function of frequency:  $Z_{in}(\omega) = Z_c + R \cdot (1 + j \cdot \omega \cdot C \cdot R)^{-1}$ , where  $Z_c$  = characteristic aortic impedance,  $R$  = total arterial resistance,  $C$  = total arterial compliance, and  $j = (-1)^{1/2}$ .<sup>31</sup>  $Z_c$  is determined by the Poiseullian resistance of the aorta and the compliance of this vessel. Characteristic aortic impedance is represented as a resistor in the model for simplicity and because its value does not vary significantly with frequency.<sup>29,32</sup>  $R$  represents the combined Poiseullian resistances of the entire arterial vascular tree. The sum of  $R$  and  $Z_c$  is mathematically equivalent to systemic vascular resistance calculated as the ratio

of MAP to mean aortic blood flow. The magnitude of  $Z_c$  is small in relation to  $R$  owing to the relative contributions to systemic vascular resistance of the aorta and the remaining arterial circulation, respectively. Total arterial compliance is the energy storage component of the Windkessel. These elements of the arterial system interact with the mechanical properties of the left ventricle to determine overall cardiovascular performance.

In the current investigation, Windkessel variables were used to quantify  $Z_{in}(\omega)$  spectra in the conscious state and during desflurane and sevoflurane anesthesia. The results indicate that desflurane caused a dose-related reduction in  $R$  concomitant with decreases in calculated systemic vascular resistance. These findings confirm and extend the results of previous studies demonstrating that desflurane-induced decreases in systemic vascular resistance contribute to declines in MAP.<sup>2-5</sup> Decreases in total arterial and systemic vascular resistance caused by desflurane were similar to those observed with isoflurane and propofol (table 3) in previous investigations from our laboratory.<sup>18,19</sup> In contrast to the findings with isoflurane and propofol, however, desflurane did not alter  $C$  and  $Z_c$ . These results indicate that desflurane reduces LV afterload by affecting resistance arterioles and not the mechanical properties of the aorta. Total arterial compliance is primarily deter-

Table 3. Relative Effects of Anesthetics and Sodium Nitroprusside on Indices of Left Ventricular Afterload

|                | Halothane | Isoflurane | Desflurane | Sevoflurane | Propofol | Nitroprusside |
|----------------|-----------|------------|------------|-------------|----------|---------------|
| R              | ↔         | ↓          | ↓          | ↔           | ↓        | ↓             |
| Z <sub>c</sub> | ↑         | ↑          | ↔          | ↑           | ↑        | ↔             |
| C              | ↑         | ↑          | ↔          | ↑           | ↑        | ↑             |

R = total arterial resistance; Z<sub>c</sub> = characteristic aortic impedance; C = total arterial compliance; ↑ = increase; ↓ = decrease; ↔ = no change.

mined by the compliance of the aorta itself<sup>33,34</sup> and is inversely related to intraluminal pressure and radius.<sup>35,36</sup> Changes in characteristic aortic impedance also are determined by the inherent viscoelastic properties of the aorta and are inversely related to the fourth power of its radius.<sup>29</sup> A pressure-induced decrease in aortic diameter may result in increases in both C and Z<sub>c</sub>. When compared to the results of our previous study,<sup>18</sup> desflurane maintained mean aortic pressure to a relatively greater degree than isoflurane at approximate end-tidal concentrations of 1.3, 1.5, and 1.7 MAC. Thus, the failure of desflurane to increase C or Z<sub>c</sub> at higher anesthetic concentrations in the current study is probably related to the less pronounced reductions in mean aortic pressure and, presumably aortic diameter, produced by this agent when compared to its structural analog.

In contrast to the findings with desflurane, no changes in R and systemic vascular resistance occurred during administration of sevoflurane. These findings are similar to those observed previously with halothane<sup>18</sup> and indicate that sevoflurane does not affect LV afterload by altering peripheral arteriolar tone in dogs. Unlike desflurane, sevoflurane also increased C and Z<sub>c</sub>, suggesting that this inhalational agent affects aortic compliance and impedance. However, sevoflurane caused relatively greater declines in mean aortic pressure than desflurane in dogs. These findings suggest that sevoflurane-induced increases in C and Z<sub>c</sub> were determined primarily by pressure-dependent reductions in aortic diameter and not by alterations in the fundamental mechanical properties of this great vessel. The slopes of the compliance-pressure relationship for sevoflurane and desflurane observed in the current investigation were not different than those of isoflurane ( $-1.41 \cdot 10^{-3} \text{ ml} \cdot \text{mmHg}^{-2}$ ;  $t = 1.02$  vs. desflurane,  $P > 0.05$ ;  $t = 1.13$  vs. sevoflurane,  $P > 0.05$ ) and halothane ( $-1.43 \cdot 10^{-3} \text{ ml} \cdot \text{mmHg}^{-2}$ ;  $t = 0.68$  vs. desflurane,  $P > 0.05$ ;  $t = 0.79$  vs. sevoflurane,  $P > 0.05$ ) as found in our previous study.<sup>18</sup> These results indicate that volatile anesthetics produce similar compliance-pressure relationships that

remain relatively flat between MAPs of 50 and 100 mmHg. In contrast, propofol and sodium nitroprusside cause significant increases in the slope of the compliance-pressure relation over this range of MAPs,<sup>18,19</sup> indicating that these arterial vasodilators probably exert direct actions on the mechanical properties of the aorta.

Total arterial compliance represents an important component of afterload that has recently been shown to directly influence LV wall stress and myocardial oxygen consumption independent of alterations in systemic vascular resistance.<sup>37</sup> Thus, although desflurane, isoflurane,<sup>18</sup> and propofol<sup>19</sup> cause dose-related reductions in R, propofol may have the most beneficial effects on LV afterload because of simultaneous and more profound increases in C (table 3). Such an increase in C may improve the rectifying characteristics of the aorta, a feature that could theoretically reduce LV energy expenditure during ejection, maintain diastolic arterial pressure, and enhance coronary perfusion under these conditions. The sevoflurane-induced increases in Z<sub>c</sub> that occurred at 1.5 and 1.7 MAC may indicate a greater resistance to LV ejection at these concentrations. These increases in Z<sub>c</sub> result in wasted LV energy transfer and less efficient coupling between the left ventricle and arterial circulation.<sup>29</sup> These effects of changes in Z<sub>c</sub> should be observed relative to the changes in the magnitude of R and C. The impact of changes in Z<sub>c</sub> is small in comparison to changes in R and C.

The current results must be interpreted within the constraints of several possible limitations. The calculation of Z<sub>in</sub>( $\omega$ ) was performed with arterial pressure waveforms measured using a chronically implanted, fluid-filled catheter. Despite the use of appropriate corrections for the magnitude and phase of Z<sub>in</sub>( $\omega$ ),<sup>17</sup> an improved frequency response may have been obtained with a high-fidelity micromanometer placed at the aortic root. Z<sub>in</sub>( $\omega$ ) magnitude spectra obtained in anesthetized dogs were somewhat less continuous than those obtained in the conscious state because more frequencies between the fundamental and corresponding harmonics were excluded on the basis of mean squared

coherence criteria. Generation by random cardiac pacing provided a greater number of harmonic frequencies, resulting in magnitude spectra in the sevoflurane. However, the magnitude spectrum generated resembles spectra generated by series analysis, an established method for determining aortic input impedance under conditions.<sup>17,29</sup>

In summary, desflurane and sevoflurane had differential effects on LV afterload (Z<sub>in</sub>( $\omega$ )) and interpreted using a model. Desflurane, but not sevoflurane, caused related reductions in LV afterload by affecting pressure and Z<sub>c</sub> at higher anesthetic concentrations with greater reductions in R than desflurane and sevoflurane (Z<sub>in</sub>( $\omega$ )) that are similar to those observed in instrumented dogs.

The authors thank David Schwab for assistance, and Angela Barnes, for

## References

- Eger II EI: New inhaled anesthetics. *Anesthesiology* 1996; 44:906-22
- Jones R, Cashman J, Manning J: The cardiovascular effects of a new fluorinated volatile anesthetic, sevoflurane (1-653), in volunteers. *Anesthesiology* 1991; 73:157-64
- Cahalan MK, Weiskopf RB, Rampil JJ, Lockhart SH, Frieri B, Johnson S, Ionescu P, Lockhart SH, Johnson S: The actions of desflurane in normotensive dogs. *Anesthesiology* 1991; 73:143-56
- Weiskopf RB, Cahalan M, Johnson S, Johnson B, Frieri B, Peterson S: The effects of sevoflurane with and without nitrous oxide on humans. *Anesth Analg* 1991; 73:157-64
- Shigematsu T, Kobayashi Ueda E, Yoshikama T, Tachikawa M: Dynamics during the induction of anesthesia with isoflurane and halothane. *Anesthesiology* 1991; 73:157-64
- Kikura M, Ikeda K: Comparison of load-independent and load-dependent esophageal echocardiography.

## DESFLURANE, SEVOFLURANE, AND LV AFTERLOAD

coherence criteria. Generation of multiple heart rates by random cardiac pacing during anesthesia would have provided a greater number of fundamental and harmonic frequencies, resulting in more continuous  $Z_{in}(\omega)$  magnitude spectra in the presence of desflurane or sevoflurane. However, the observed spectral discontinuity resembles spectra generated with standard Fourier series analysis, an established method for evaluating aortic input impedance under a variety of physiologic conditions.<sup>17,29</sup>

In summary, desflurane and sevoflurane produce differential effects on LV afterload determined with  $Z_{in}(\omega)$  and interpreted using a three-element Windkessel model. Desflurane, but not sevoflurane, caused dose-related reductions in R and systemic vascular resistance, indicating that this new volatile anesthetic decreases LV afterload by affecting peripheral arteriolar tone. In contrast, sevoflurane, but not desflurane, increased C and  $Z_c$  at higher anesthetic concentrations concomitant with greater reductions in MAP. The results indicate that desflurane and sevoflurane cause changes in  $Z_{in}(\omega)$  that are similar to those described previously with isoflurane and halothane, respectively, in chronically instrumented dogs.<sup>18</sup>

The authors thank Dave Schwabe and John Tessmer, for technical assistance, and Angela Barnes, for preparation of the manuscript.

## References

- Eger II EI: New inhaled anesthetics. *ANESTHESIOLOGY* 1994; 80:906-22
- Jones R, Cashman J, Mant T: Clinical impressions and cardiovascular effects of a new fluorinated inhalational anaesthetic, desflurane (I-653), in volunteers. *Br J Anaesth* 1990; 64:11-5
- Cahalan MK, Weiskopf RB, Eger II EI, Yasuda N, Ionescu P, Rampil IJ, Lockhart SH, Freire B, Peterson NH: Hemodynamic effects of desflurane/nitrous oxide anesthesia in volunteers. *Anesth Analg* 1991; 73:157-64
- Weiskopf RB, Cahalan MK, Eger II EI, Yasuda N, Rampil IJ, Ionescu P, Lockhart SH, Johnson BH, Freire B, Kelley S: Cardiovascular actions of desflurane in normocarbic volunteers. *Anesth Analg* 1991; 73:143-56
- Weiskopf R, Cahalan M, Ionescu P, Eger II EI, Yasuda N, Lockhart S, Johnson B, Friere B, Peterson N: Cardiovascular actions of desflurane with and without nitrous oxide during spontaneous ventilation in humans. *Anesth Analg* 1991; 73:165-74
- Shigematsu T, Kobayashi M, Miyazawa N, Yoroze T, Toyuda Y, Ueda E, Yoshikama T, Tachikawa S: Effects of sevoflurane on hemodynamics during the induction of anesthesia compared with those of isoflurane, enflurane and halothane. *J Anesth* 1993; 42:1748-53
- Kikura M, Ikeda K: Comparison of effects of sevoflurane-nitrous oxide and enflurane-nitrous oxide on myocardial contractility in humans. Load-independent and noninvasive assessment with transesophageal echocardiography. *ANESTHESIOLOGY* 1993; 79:235-43
- Pagel PS, Kampine JP, Schmeling WT, Wartier DC: Evaluation of myocardial contractility in the chronically instrumented dog with intact autonomic nervous system function: Effects of desflurane and isoflurane. *Acta Anaesthesiol Scand* 1993; 37:203-10
- Harkin CP, Pagel PS, Kersten JR, Hettrick DA, Wartier DC: Direct negative inotropic and lusitropic effects of sevoflurane. *ANESTHESIOLOGY* 1994; 81:156-67
- Bernard JM, Walters PF, Doursart MF, Florence B, Chelly JE, Merin RY: Effects of sevoflurane and isoflurane on cardiac and coronary dynamics in chronically instrumented dogs. *ANESTHESIOLOGY* 1990; 72:659-62
- Merin RG, Bernard J-M, Doursout M-F, Cohen M, Chelly J: Comparison of the effects of isoflurane and desflurane on cardiodynamics and regional blood flow in the chronically instrumented dog. *ANESTHESIOLOGY* 1991; 74:568-74
- Manohar M, Parks CM: Porcine systemic and regional organ blood flow during 1.0 and 1.5 minimum alveolar concentrations of sevoflurane anesthesia without and with 50% nitrous oxide. *J Pharmacol Exp Ther* 1984; 231:640-8
- Kazama T, Ikeda K: The comparative cardiovascular effects of sevoflurane with halothane and isoflurane. *J Anesth* 1988; 2:63-8
- Crawford MW, Lerman J, Saldivia V, Carmichael FJ: Hemodynamic and organ blood flow responses to halothane and sevoflurane anesthesia during spontaneous ventilation. *Anesth Analg* 1992; 75:1000-6
- Crawford MW, Lerman J, Saldivia V, Orrego H, Carmichael FJ: The effect of adenosine-induced hypotension on systemic and splanchnic hemodynamics during halothane or sevoflurane in the rat. *ANESTHESIOLOGY* 1994; 80:159-67
- Yamada T, Takeda J, Koyama K, Sekiguchi H, Fukushima K, Kawazoe T: Effects of sevoflurane, isoflurane, enflurane, and halothane on left ventricular diastolic performance in dogs. *J Cardiothorac Vasc Anesth* 1994; 8:618-24
- Milnor WR: *Hemodynamics*. Baltimore, Williams & Wilkins, 1989
- Hettrick DA, Pagel PS, Wartier DC: Differential effects of isoflurane and halothane on aortic input impedance quantified using a three element Windkessel model. *ANESTHESIOLOGY* 1995; 83:361-73
- Lowe D, Hettrick DA, Pagel PS, Wartier DC: Propofol alters determinants of left ventricular afterload. *ANESTHESIOLOGY* 1996; 84:368-76
- Taylor MG: Use of random excitation and spectral analysis in the study of parameters of the cardiovascular system. *Circ Res* 1966; 18:585-95
- Burkhoff D, Alexander Jr J, Schipke J: Assessment of Windkessel as a model of aortic input impedance. *Am J Physiol* 1988; 255:H742-H53
- Challis RE, Kitney RI: Biomedical signal processing (in four parts). Part 3. The power spectrum and coherence function. *Med Biol Eng Comput* 1991; 29:225-41
- Marple Jr SL: *Digital spectral analysis with applications*. Englewood Cliffs, Prentice-Hall, 1987
- Pepine CJ, Nichols WW, Curry Jr RC, Conti CR: Aortic input impedance during nitroprusside infusion: A reconsideration of afterload reduction and beneficial action. *J Clin Invest* 1979; 64:643-54
- Murgo JP, Westerhof N, Giolma JP, Altobelli SA: Aortic input



impedance in normal man: Relationship to pressure wave forms. *Circulation* 1980; 62:105-16

26. Liu Z, Brin KP, Yin FCP: Estimation of total arterial compliance: An improved method and evaluation of current methods. *Am J Physiol* 1986; 251:H588-600

27. Tallarida RJ, Murray RB: *Manual of Pharmacologic Calculations with Computer Programs*. New York, Springer, 1987

28. Fung YC: *Biomechanics: Mechanical Properties of Living Tissues*. 2nd edition. New York, Springer, 1993

29. Nichols WW, O'Rourke MF: *McDonald's Blood Flow in Arteries: Theoretic, Experimental and Clinical Principles*. Philadelphia, Lea & Febiger, 1990

30. Elzinga G, Westerhof N: Pressure and flow generated by the left ventricle against different impedances. *Circ Res* 1973; 32:178-86

31. Sagawa K, Maughan L, Suga H, Sunagawa K: *Cardiac contraction and the pressure-volume relationship*. New York, Oxford University Press, 1988, p 251

32. O'Rourke MF: Vascular impedance in studies of arterial and cardiac function. *Physiol Rev* 1982; 62:570-623

33. Westerhof N, Bosman F, De Vries CJ, Noordergraaf A: Analog studies of the human systemic arterial tree. *J Biomech* 1969; 2:121-43

34. Ferguson III JJ, Miller MJ, Sahagian P, Aroesty JM, McKay RG: Assessment of aortic pressure-volume relationships with an impedance catheter. *Cathet Cardiovasc Diagn* 1988; 15:27-36

35. Alexander Jr J, Burkhoff D, Schipke J, Sagawa K: Influence of mean pressure on aortic impedance and reflections in the systemic arterial system. *Am J Physiol* 1989; 257:H969-78

36. Van Den Bos GC, Westerhof N, Elzinga G, Sipkema P: Reflection in the systemic arterial system: Effects of aortic and carotid occlusion. *Cardiovasc Res* 1976; 10:565-73

37. Sacki A, Recchia F, Kass DA: Systolic flow augmentation in hearts ejecting into a model of stiff aging vasculature. Influence on myocardial perfusion-demand balance. *Circ Res* 1995; 76:132-41

## Effect of Propofol on Place Conditioning

L. Pain, M.D.,\* P. Oberling, M.D.†

**Background:** Whether propofol state remains unclear from clinical study, the effect on affective state of esthetic doses of propofol was compared with methohexital.

**Methods:** In the place conditioning study, the effect on affective state of esthetic doses of propofol was compared with methohexital.

**Results:** The conditioned response induced effect was repeatedly produced in the place conditioning study. During a subsequent experiment, the drug-paired compartment would be indicated by the drug. For all experiments, the recovery period from anesthesia was 10-15 min.

**Conclusions:** The recovery period from anesthesia was 10-15 min, whereas for the other group, anesthesia was induced by an equivalent anesthetic dose of propofol that they received in the study.

**Key words:** propofol, place conditioning, affective state, anesthesia, recovery period.

**Introduction:** The recovery period from anesthesia was 10-15 min, whereas for the other group, anesthesia was induced by an equivalent anesthetic dose of propofol that they received in the study.

**Methods:** In the place conditioning study, the effect on affective state of esthetic doses of propofol was compared with methohexital.

**Results:** The conditioned response induced effect was repeatedly produced in the place conditioning study. During a subsequent experiment, the drug-paired compartment would be indicated by the drug. For all experiments, the recovery period from anesthesia was 10-15 min.

**Conclusions:** The recovery period from anesthesia was 10-15 min, whereas for the other group, anesthesia was induced by an equivalent anesthetic dose of propofol that they received in the study.

**Key words:** propofol, place conditioning, affective state, anesthesia, recovery period.

**Introduction:** The recovery period from anesthesia was 10-15 min, whereas for the other group, anesthesia was induced by an equivalent anesthetic dose of propofol that they received in the study.

**Methods:** In the place conditioning study, the effect on affective state of esthetic doses of propofol was compared with methohexital.

**Results:** The conditioned response induced effect was repeatedly produced in the place conditioning study. During a subsequent experiment, the drug-paired compartment would be indicated by the drug. For all experiments, the recovery period from anesthesia was 10-15 min.

**Conclusions:** The recovery period from anesthesia was 10-15 min, whereas for the other group, anesthesia was induced by an equivalent anesthetic dose of propofol that they received in the study.

**Key words:** propofol, place conditioning, affective state, anesthesia, recovery period.

\* Consultant Anesthesiologist, Service de Chirurgie.

† Assistant Professor of Physiology, Université de la Recherche Médicale.

‡ Professor of Physiology, l'Institut de Recherche Médicale.

§ Behavioral Neurobiologist.

Received from Service d'Anesthésie (J.C. Otteni), Hôpitaux Universitaires de Neurophysiologie et Biologie de Strasbourg (U405 INSERM), Strasbourg, France.

Accepted for publication 2, 1994. Supported by grants from l'Institut de Recherche Médicale (INSERM 911012).

Address reprint requests to Dr. Pain, Service de Chirurgie, CHU Hautepierre, Strasbourg, France.

Anesthesiology, V 85, No 1, Jul 1996
